# Supplementary material
Source: PubMed Central journal article supplement (PMC1283763)
Supplement: plntphys_pp.105.067330_1.pdf [file plntphys_pp.105.067330_1.pdf]

**Supplement S1.** Genes preferentially expressed in wild-type pericycle cells compared to the pericycle of the lateral root initiation mutant *rum1*.

| GeneID                                                                | p-value <sup>a</sup> | Fold-change <sup>a</sup> | Blastx result <sup>b</sup> [Species] Accession number                                                        |
|-----------------------------------------------------------------------|----------------------|--------------------------|--------------------------------------------------------------------------------------------------------------|
| <b>Transcription<sup>c</sup></b>                                      |                      |                          |                                                                                                              |
| MEST 24-E09                                                           | 4.88E-03             | 7.01                     | Helix-loop-helix-like protein [ <i>O. sativa</i> ] AAO72577.1                                                |
| 618015B12.X1                                                          | 5.56E-03             | 2.75                     | Helix-loop-helix protein [ <i>A. thaliana</i> ] NP_194827.1                                                  |
| MEST 29-G12                                                           | 1.95E-03             | 2.75                     | Pumilio/Mpt5 family RNA-binding protein [ <i>O. sativa</i> ] BAB89558.1                                      |
| MEST 27-C10                                                           | 5.30E-03             | 2.74                     | Nucleoid DNA-binding-like protein [ <i>O. sativa</i> ] BAC15479.1                                            |
| 614089B09.Y1                                                          | 3.14E-03             | 2.66                     | Putative RNA helicase [ <i>O. sativa</i> ] NP_922213.1                                                       |
| MEST 24-F07                                                           | 9.34E-03             | 2.43                     | U2 Snrnp auxiliary factor [ <i>A. thaliana</i> ] AAM98156.1                                                  |
| 687064E06.Y1                                                          | 4.67E-04             | 2.33                     | DNA methyltransferase ZMET4 [ <i>Z. mays</i> ] AAK40306.1                                                    |
| 707050G12.X1                                                          | 6.69E-04             | 2.33                     | High mobility group protein MNB1b [ <i>Z. mays</i> ] T03640                                                  |
| MEST 35-G08                                                           | 5.81E-03             | 2.28                     | KH domain protein [ <i>A. thaliana</i> ] NP_201244.2                                                         |
| 614056B02.X1                                                          | 1.30E-03             | 2.00                     | RRNA methylase [ <i>A. thaliana</i> ] NP_197043.1                                                            |
| <b>Signal transduction mechanism/cellular communication</b>           |                      |                          |                                                                                                              |
| 486062F10.X1                                                          | 3.10E-03             | 2.55                     | Protein kinase CK2 catalytic subunit CK2 alpha-3 [ <i>Z. mays</i> ] AAG36872.1                               |
| MEST 11-G06                                                           | 3.12E-03             | 2.36                     | Protein kinase [ <i>O. sativa</i> ] BAA99439.1                                                               |
| 687067C03.X1                                                          | 2.07E-03             | 2.23                     | FKBP12 interacting protein (FIP37) [ <i>A. thaliana</i> ] NP_190985.1                                        |
| 603017B03.X1                                                          | 6.40E-03             | 2.19                     | Receptor-like protein kinase [ <i>O. sativa</i> ] AAM27467.1                                                 |
| 486082B04.X1                                                          | 6.59E-03             | 2.02                     | Protein phosphatase 2A regulatory subunit [ <i>O. sativa</i> ] AAK13162.1                                    |
| <b>Cell cycle and DNA processing</b>                                  |                      |                          |                                                                                                              |
| 687027G04.X3                                                          | 1.73E-03             | 2.57                     | HD2 type histone deacetylase HDA106 [ <i>Z. mays</i> ] AF384033_1                                            |
| 606022B03.X1                                                          | 9.43E-03             | 2.22                     | Wee1-like protein [ <i>Z. mays</i> ] AF123594_1                                                              |
| 614051D05.Y1                                                          | 5.79E-03             | 2.09                     | Ran binding protein [ <i>O. sativa</i> ] NP_910461.1                                                         |
| 707090F03.X1                                                          | 8.74E-03             | 2.01                     | Cyclin T2 [ <i>O. sativa</i> ] BAD17160.1                                                                    |
| <b>Metabolism</b>                                                     |                      |                          |                                                                                                              |
| 707051F04.X1                                                          | 3.10E-03             | 5.13                     | Glyoxalase II [ <i>O. sativa</i> ] BAB90501.1                                                                |
| 486059F07.X3                                                          | 2.29E-03             | 3.19                     | 2,3-bisphosphoglycerate-independent phosphoglycerate mutase (BPG-Independent PGAM) [ <i>Z. mays</i> ] P30792 |
| MEST 166-B10                                                          | 4.35E-03             | 3.19                     | Pyruvate decarboxylase [ <i>Z. mays</i> ] AAL99744.1                                                         |
| 614062G08.Y1                                                          | 8.13E-03             | 2.94                     | Neoxanthin cleavage enzyme [ <i>A. thaliana</i> ] T51734                                                     |
| 687024C07.Y2                                                          | 9.27E-03             | 2.82                     | Aldehyde dehydrogenase [ <i>A. thaliana</i> ] AAM61211.1                                                     |
| MEST 27-A10                                                           | 1.05E-03             | 2.77                     | Ketol-acid reductoisomerase [ <i>O. sativa</i> ] BAB86573.1                                                  |
| MEST113-C07                                                           | 9.19E-03             | 2.57                     | Cinnamyl alcohol dehydrogenase [ <i>L. perenne</i> ] AAL99535.1                                              |
| MEST 121-G10                                                          | 2.55E-03             | 2.56                     | C2 domain-containing protein [ <i>A. thaliana</i> ] NP_191525.2                                              |
| 687065B03.X1                                                          | 5.45E-03             | 2.40                     | Nodulin/Glutamate-ammonia ligase [ <i>A. thaliana</i> ] NP_190886.2                                          |
| MEST 350-A12                                                          | 6.15E-03             | 2.34                     | Formamidase [ <i>O. sativa</i> ] BAB63595.1                                                                  |
| 614031D02.Y1                                                          | 6.95E-04             | 2.31                     | Haloacid dehalogenase-like hydrolase [ <i>A. thaliana</i> ] NP_974931.1                                      |
| 606034E09.X1                                                          | 1.67E-03             | 2.30                     | S-Adenosylmethionine synthetase 1 [ <i>O. sativa</i> ] P46611                                                |
| 603014F05.X1                                                          | 4.20E-04             | 2.21                     | Glucose-6-phosphate isomerase [ <i>S. oleracea</i> ] T09153                                                  |
| 707083E03.X1                                                          | 6.12E-03             | 2.10                     | Short-chain dehydrogenase/reductase [ <i>A. thaliana</i> ] BAB02424.1                                        |
| MEST 338-H06                                                          | 9.37E-03             | 2.09                     | NADH oxidoreductase [ <i>Z. mays</i> ] CAB97005.1                                                            |
| <b>Cellular Transport, Transport Facilitation and Transport route</b> |                      |                          |                                                                                                              |
| MEST 197-B05                                                          | 9.90E-03             | 257.64                   | Vesicle soluble NSF attachment protein receptor [ <i>O. sativa</i> ] BAC16405.1                              |
| MEST 233-C02                                                          | 6.42E-04             | 3.19                     | Cation diffusion facilitator 9 [ <i>O. sativa</i> ] BAD81688.1                                               |
| 603040G10.X1                                                          | 7.97E-03             | 3.09                     | Amino acid transport protein [ <i>O. sativa</i> ] BAD37472.1                                                 |
| 606012C06.X1                                                          | 3.02E-03             | 2.50                     | Membrane protein-1 [ <i>M. polymorpha</i> ] BAB71817.1                                                       |
| MEST 334-A04                                                          | 5.67E-04             | 2.35                     | Cationic amino acid transporter [ <i>O. sativa</i> ] AAO73233.1                                              |
| MEST 31-F02                                                           | 5.01E-03             | 2.20                     | P-Type ATPase [ <i>H. vulgare</i> ] CAC40031.1                                                               |
| MEST 148-G01                                                          | 4.50E-03             | 2.11                     | Nonclathrin coat protein, gamma [ <i>O. sativa</i> ] AAN60990.1                                              |
| MEST 72-G11                                                           | 1.05E-03             | 2.09                     | Allinase [ <i>A. thaliana</i> ] NP_564436.1                                                                  |
| <b>Translation</b>                                                    |                      |                          |                                                                                                              |
| 614100E06.X1                                                          | 9.99E-03             | 2.48                     | Deoxyhypusine synthase [ <i>M. acuminata</i> ] AAG53643.1                                                    |

| GenelD                                                   | p-value <sup>a</sup> | Fold-change <sup>a</sup> | Blastx result <sup>b</sup> [Species] Accession number            |
|----------------------------------------------------------|----------------------|--------------------------|------------------------------------------------------------------|
| 683007G04.X1                                             | 2.12E-03             | 2.02                     | Argonaute [ <i>A. thaliana</i> ] NP_175274.1                     |
| <b>Cell fate</b>                                         |                      |                          |                                                                  |
| 707077G05.X1                                             | 9.86E-03             | 28.40                    | Growth-regulating factor 1 [ <i>O. sativa</i> ] BAC22210.1       |
| <b>Protein fate (folding, modification, destination)</b> |                      |                          |                                                                  |
| MEST 39-D10                                              | 3.90E-03             | 3.01                     | Serine carboxypeptidase [ <i>O. sativa</i> ] AAL73563.1          |
| MEST 20-A09                                              | 8.72E-03             | 2.02                     | Translocation protein-related [ <i>A. thaliana</i> ] NP_566671.1 |
| <b>Subcellular localization</b>                          |                      |                          |                                                                  |
| 614006A06.X2                                             | 6.44E-03             | 2.26                     | Arginine N-methyltransferase [ <i>A. thaliana</i> ] BAB01859.1   |
| 486019C01.X5                                             | 4.51E-03             | 2.02                     | Myosin-like protein My5 [ <i>O. sativa</i> ] BAC01233.1          |
| <b>Defence, cell rescue and virulence</b>                |                      |                          |                                                                  |
| MEST 42-C07                                              | 7.83E-03             | 2.43                     | Herbicide safener binding protein 1 [ <i>Z. mays</i> ] T01354    |
| <b>Transposable elements, viral and plasmid protein</b>  |                      |                          |                                                                  |
| MEST 35-A04                                              | 3.13E-03             | 3.26                     | Gag-pol polyprotein [ <i>Z. mays</i> ] AAL76001.1                |
| <b>Unknown function</b>                                  |                      |                          |                                                                  |
| 486043B11.X3                                             | 1.38E-03             | 10.85                    | No database hit                                                  |
| 606018A05.X1                                             | 7.92E-03             | 5.77                     | Unknown protein [ <i>A. thaliana</i> ] NP_177175.2               |
| 486073E10.X2                                             | 9.92E-03             | 4.68                     | Unknown protein [ <i>A. thaliana</i> ] NP_177698.1               |
| 707087E08.X1                                             | 1.44E-03             | 4.45                     | Unknown protein [ <i>O. sativa</i> ] BAB92207.1                  |
| Mest12-A10                                               | 1.00E-03             | 3.89                     | Unknown Protein [ <i>O. Sativa</i> ] BAA96580.1                  |
| MEST 9-E07                                               | 5.94E-03             | 3.88                     | No database hit                                                  |
| 945030c08.Y1                                             | 4.28E-03             | 3.44                     | Unknown Protein [ <i>O. Sativa</i> ] BAB91997.1                  |
| 486051G05.X2                                             | 1.89E-03             | 3.39                     | No database hit                                                  |
| 605004D07.X1                                             | 7.77E-03             | 3.38                     | No database hit                                                  |
| 614028G09.Y1                                             | 6.38E-03             | 3.37                     | Unknown protein [ <i>A. thaliana</i> ] NP_200633.1               |
| MEST 19-A08                                              | 4.73E-03             | 2.99                     | Unknown protein [ <i>O. sativa</i> ] BAB86427.1                  |
| 496014F12.X1                                             | 4.19E-03             | 2.96                     | No database hit                                                  |
| 486039H05.X3                                             | 7.67E-03             | 2.92                     | No database hit                                                  |
| 486068D05.X1                                             | 9.69E-04             | 2.78                     | Unknown protein [ <i>A. thaliana</i> ] NP_195064.2               |
| MEST 15-G04                                              | 5.31E-03             | 2.78                     | No database hit                                                  |
| 614067C02.X1                                             | 2.58E-03             | 2.72                     | No database hit                                                  |
| Mest233-G08                                              | 3.95E-04             | 2.60                     | Unknown Protein [ <i>A. Thaliana</i> ] NP_565993.1               |
| MEST 356-F08                                             | 7.73E-03             | 2.51                     | No database hit                                                  |
| MEST 73-E06                                              | 9.47E-03             | 2.45                     | Unknown protein [ <i>A. thaliana</i> ] NP_173410.1               |
| 486052C05.X2                                             | 9.61E-03             | 2.41                     | No database hit                                                  |
| 614051D08.X2                                             | 3.18E-03             | 2.31                     | No database hit                                                  |
| 603043E01.X1                                             | 8.71E-03             | 2.24                     | No database hit                                                  |
| 614006G05.X2                                             | 6.72E-03             | 2.23                     | Unknown protein [ <i>O. sativa</i> ] AAO37540.1                  |
| 614091F06.X1                                             | 9.12E-03             | 2.22                     | No database hit                                                  |
| 618038C04.X1                                             | 3.45E-03             | 2.21                     | No database hit                                                  |
| 486092F07.Y1                                             | 1.91E-03             | 2.20                     | Unknown protein [ <i>O. sativa</i> ] AAN59771.1                  |
| 606054G11.X2                                             | 9.61E-03             | 2.12                     | No database hit                                                  |
| 687027A12.X3                                             | 4.13E-03             | 2.12                     | No database hit                                                  |
| 603014E11.X1                                             | 2.63E-03             | 2.10                     | No database hit                                                  |
| MEST 250-F04                                             | 5.47E-03             | 2.10                     | No database hit                                                  |
| 606063G10.X1                                             | 7.44E-04             | 2.08                     | No database hit                                                  |
| 486058E11.X2                                             | 2.38E-03             | 2.06                     | Unknown protein [ <i>A. thaliana</i> ] BAB02568.1                |
| 687066H09.Y1                                             | 4.92E-03             | 2.05                     | No database hit                                                  |
| 687028D11.X4                                             | 4.60E-03             | 2.02                     | Unknown protein [ <i>O. sativa</i> ] BAB16337.1                  |
| 707087A08.X1                                             | 7.87E-03             | 2.02                     | Unknown protein [ <i>A. thaliana</i> ] NP_182078.1               |
| 683007C10.X1                                             | 7.79E-03             | 2.02                     | No database hit                                                  |
| 605033E06.X1                                             | 7.00E-03             | 2.01                     | No database hit                                                  |
| 614092H09.X1                                             | 5.50E-03             | 2.01                     | No database hit                                                  |
| MEST 113-B05                                             | 6.91E-03             | 2.00                     | No database hit                                                  |

<sup>a</sup> p-value and fold changes of the highest available scan setting for each gene are given

<sup>b</sup> In cases where no blast hit for the EST was found the blast hit for the EST contig (ZmTUC) that includes the EST are given

<sup>9</sup>Functional classification according to the MIPS database (Munich Information Center for Protein sequences; version 2.0;  
<http://mips.gsf.de/proj/thal/db>)

**Supplement S2.** Genes upregulated in the pericycle of the lateral root initiation mutant *rum1* compared to wild-type pericycle cells.

| GeneID                                                                 | p-value <sup>a</sup> | Fold-change <sup>a</sup> | Blastx result <sup>b</sup> [Species] Accession number                             |
|------------------------------------------------------------------------|----------------------|--------------------------|-----------------------------------------------------------------------------------|
| <b>Transcription<sup>c</sup></b>                                       |                      |                          |                                                                                   |
| 707020F12.y1                                                           | 4.11E-03             | 2.90                     | Transcription factor HBP-1a (c14) [ <i>T. aestivum</i> ] A54415                   |
| 707074G06.x1                                                           | 4.51E-04             | 2.61                     | Drought responsive element-binding factor 1 [ <i>Z. mays</i> ] AAM80486.1         |
| 707061E09.x1                                                           | 5.47E-03             | 2.20                     | Susceptibility homeodomain transcription factor [ <i>O. sativa</i> ] BAD54334.1   |
| 486068H10.y1                                                           | 3.03E-03             | 2.12                     | Zinc finger protein [ <i>O. sativa</i> ] BAB07996.1                               |
| <b>Signal transduction mechanism/cellular communication</b>            |                      |                          |                                                                                   |
| 486068C07.x1                                                           | 8.16E-03             | 2.53                     | Serine/ threonine kinase [ <i>S. bicolor</i> ] AM47579.1                          |
| 707049E12.x1                                                           | 8.33E-03             | 2.29                     | Receptor-like kinase [ <i>A. thaliana</i> ] NP_172608.1                           |
| 614098A03.y1                                                           | 8.42E-03             | 2.12                     | Coatomer complex subunit [ <i>A. thaliana</i> ] NP_175645.1                       |
| <b>Metabolism</b>                                                      |                      |                          |                                                                                   |
| MEST62-E09                                                             | 3.23E-03             | 2.46                     | O-Methyltransferase ZRP4 (OMT) [ <i>Z. mays</i> ] P47917                          |
| MEST93-A01                                                             | 2.46E-03             | 2.22                     | Indole-3-glycerol phosphate synthase [ <i>O. sativa</i> ] BAC22396.1              |
| 603009B04.x1                                                           | 6.42E-04             | 2.12                     | Thiazole biosynthetic enzyme 1-1. chloroplast precursor [ <i>Z. mays</i> ] Q41738 |
| MEST310-E10                                                            | 2.87E-04             | 2.09                     | (1-4)-beta-mannan endohydrolase [ <i>O. sativa</i> ] BAB56016.1                   |
| 606066D09.x1                                                           | 7.58E-03             | 2.08                     | Thiolase [ <i>O. sativa</i> ] AAK54299.1                                          |
| 707016C11.y1                                                           | 6.38E-03             | 2.05                     | Ribulose-5-phosphate kinase [ <i>T. aestivum</i> ] CAA41020.1                     |
| MEST81-H01                                                             | 7.42E-03             | 2.04                     | Caffeoyl-CoA 3-O-methyltransferase [ <i>O. sativa</i> ] BAA81774.1                |
| <b>Energy</b>                                                          |                      |                          |                                                                                   |
| 945002F02.X3                                                           | 4.49E-03             | 5.18                     | NADH-ubiquinone oxidoreductase B8 subunit [ <i>A. thaliana</i> ] NP_199600.1      |
| 606014D04.x1                                                           | 4.83E-03             | 2.39                     | NADPH-quinone oxidoreductase [ <i>O. sativa</i> ] BAB64708.1                      |
| MEST12-B06                                                             | 2.29E-03             | 2.37                     | Ubiquinol-cytochrome c reductase complex protein [ <i>S. tuberosum</i> ] P48502   |
| MEST41-D06                                                             | 3.66E-03             | 2.17                     | ATP synthase epsilon chain [ <i>Z. mays</i> ] Q41898                              |
| 707018A04.y1                                                           | 6.28E-03             | 2.11                     | Ubiquinol-cytochrome c reductase [ <i>O. sativa</i> ] BAA95821.1                  |
| 486058C09.x2                                                           | 5.51E-03             | 2.06                     | Ubiquinol-cytochrome c reductase [ <i>A. thaliana</i> ] NP_190841.1               |
| 614042E11.x2                                                           | 8.99E-03             | 2.02                     | Cytochrome c oxidase polypeptide VC [ <i>H. vulgare</i> ] Q42841                  |
| <b>Cellular transport, transport facilitation and transport routes</b> |                      |                          |                                                                                   |
| 486093D03.y1                                                           | 7.57E-03             | 2.18                     | Mitochondrial carrier protein family [ <i>A. thaliana</i> ] NP_201302.1           |
| <b>Translation</b>                                                     |                      |                          |                                                                                   |
| 614008G05.x2                                                           | 7.19E-03             | 2.20                     | 60S ribosomal protein L38 [ <i>O. sativa</i> ] BAC45072.1                         |
| <b>Protein fate</b>                                                    |                      |                          |                                                                                   |
| MEST18-C05                                                             | 8.48E-03             | 4.53                     | Serine carboxypeptidase II-1 precursor [ <i>H. vulgare</i> ] P55747               |
| 614041D02.x2                                                           | 7.09E-03             | 3.48                     | IAA2.3 deduced protein [ <i>N. tabacum</i> ] AAD32142.1                           |
| 618002E08.x2                                                           | 3.02E-03             | 2.51                     | Copper chaperone homolog CCH [ <i>O. sativa</i> ] T50779                          |
| 707030G07.x2                                                           | 6.98E-03             | 2.50                     | Cystatin II [ <i>Z. mays</i> ] BAB32902.1                                         |
| MEST18-C06                                                             | 3.11E-03             | 2.11                     | Clathrin assembly protein [ <i>O. sativa</i> ] AAN08659.1                         |
| <b>Subcellular localization</b>                                        |                      |                          |                                                                                   |
| MEST14-B04                                                             | 1.84E-03             | 12.07                    | Beta-expansin 5 [ <i>Z. mays</i> ] AAK56128.1                                     |
| 683003D07.x1                                                           | 1.01E-03             | 2.07                     | Beta-expansin [ <i>O. sativa</i> ] AAL04421.1                                     |
| 614041F07.y1                                                           | 4.84E-03             | 2.02                     | CTD-like phosphatase domain-containing protein [ <i>O. sativa</i> ] BAB92447.1    |
| <b>Cell rescue, defense and virulence</b>                              |                      |                          |                                                                                   |
| 707020E03.x1                                                           | 8.55E-03             | 3.13                     | Heat-shock protein [ <i>O. sativa</i> ] BAB32902.1                                |
| MEST11-C11                                                             | 6.87E-03             | 2.74                     | Disease resistance response protein [ <i>A. thaliana</i> ] NP_176762.1            |
| 605001F08.x1                                                           | 8.73E-03             | 2.39                     | Tetratricopeptide repeat (TPR)-containing protein [ <i>O. sativa</i> ] BAD17488.1 |
| 486026D12.x1                                                           | 8.14E-03             | 2.10                     | Defensin [ <i>T. aestivum</i> ] BAC10287.1                                        |
| MEST15-C12                                                             | 4.84E-03             | 2.04                     | Heat shock protein 82 [ <i>O. sativa</i> ] P33126                                 |
| <b>Transposable elements, viral and plasmid proteins</b>               |                      |                          |                                                                                   |
| 603009C09.x1                                                           | 6.83E-03             | 2.00                     | Rice retroelement 2 [ <i>Z. mays</i> ] AAL75972.1                                 |
| <b>Unclassified proteins</b>                                           |                      |                          |                                                                                   |
| MEST340-E12                                                            | 7.45E-03             | 2.19                     | Striated muscle activator-like protein [ <i>O. sativa</i> ] AAT81723.1            |
| MEST39-B6                                                              | 7.10E-03             | 2.17                     | Pollen specific protein C13 precursor [ <i>O. sativa</i> ] AAM08621.1             |
| 707074D06.x1                                                           | 1.48E-04             | 2.07                     | Pollen specific protein C13 precursor [ <i>Z. mays</i> ] P33050                   |
| <b>Unknown function</b>                                                |                      |                          |                                                                                   |
| 945001C11.Y1                                                           | 9.92E-03             | 17.72                    | No database hit                                                                   |
| 945001E08.X3                                                           | 2.39E-03             | 7.95                     | Unknown protein [ <i>O. sativa</i> ] AAO38494.1                                   |
| 614059G05.y1                                                           | 9.41E-04             | 4.93                     | No database hit                                                                   |
| 614028F01.y1                                                           | 1.54E-03             | 2.81                     | Unknown protein [ <i>A. thaliana</i> ] C86271                                     |

| GeneID                              | p-value <sup>a</sup> | Fold-change <sup>a</sup> | Blastx result <sup>b</sup> [Species] Accession number |
|-------------------------------------|----------------------|--------------------------|-------------------------------------------------------|
| 707058F12.x2                        | 7.26E-05             | 2.80                     | No database hit                                       |
| 605005G03.x1                        | 2.08E-03             | 2.74                     | Unknown protein [ <i>O. sativa</i> ] BAB20639.1       |
| MEST137-F12                         | 6.61E-03             | 2.66                     | No database hit                                       |
| 707030B03.x2                        | 7.59E-03             | 3.55                     | Unknown protein [ <i>A. thaliana</i> ] AAM10390.1     |
| 603010F04.x1                        | 7.24E-03             | 2.41                     | Unknown protein [ <i>O. sativa</i> ] BAB92454.1       |
| <b>Unknown function (continued)</b> |                      |                          |                                                       |
| 496036D12.x1                        | 8.53E-03             | 2.35                     | No database hit                                       |
| 707041B02.x1                        | 4.01E-03             | 2.33                     | No database hit                                       |
| 614078E02.x1                        | 4.57E-03             | 2.31                     | No database hit                                       |
| 618043E10.x1                        | 8.48E-03             | 2.29                     | No database hit                                       |
| 614001E05.x1                        | 2.85E-03             | 2.25                     | No database hit                                       |
| 603013D04.x1                        | 8.94E-03             | 2.23                     | No database hit                                       |
| 603034F04.x1                        | 4.98E-03             | 2.23                     | No database hit                                       |
| 707078G10.x1                        | 5.22E-03             | 2.22                     | Unknown protein [ <i>O. sativa</i> ] BAA94780.1       |
| 606011B08.x1                        | 5.53E-04             | 2.20                     | Unknown protein [ <i>A. thaliana</i> ] NP_175397.1    |
| 486068D12.x1                        | 5.39E-03             | 2.20                     | No database hit                                       |
| 618044G06.x1                        | 1.08E-03             | 2.19                     | No database hit                                       |
| MEST66-G04                          | 7.42E-04             | 2.17                     | Unknown protein [ <i>O. sativa</i> ] AAO65857.1       |
| 614067G07.y1                        | 7.93E-03             | 2.14                     | No database hit                                       |
| 707050E12.x1                        | 2.92E-03             | 2.14                     | No database hit                                       |
| 614048E03.y1                        | 4.88E-03             | 2.12                     | No database hit                                       |
| 486085B08.x2                        | 1.04E-03             | 2.11                     | No database hit                                       |
| 496008A03.x1                        | 7.86E-03             | 2.10                     | No database hit                                       |
| 614040C04.y1                        | 3.31E-03             | 2.08                     | Unknown protein [ <i>O. sativa</i> ] BAB92380.1       |
| 606007A04.x1                        | 5.66E-03             | 2.08                     | No database hit                                       |
| 618037B11.x1                        | 8.68E-03             | 2.08                     | No database hit                                       |
| 606021A06.x2                        | 6.84E-03             | 2.07                     | No database hit                                       |
| 606026C01.x2                        | 3.18E-03             | 2.01                     | Unknown protein [ <i>O. sativa</i> ] AAD27681.1       |
| MEST106-A02                         | 9.89E-03             | 2.01                     | Unknown protein [ <i>O. sativa</i> ] AAN87739.1       |
| 614028B01.y1                        | 5.54E-03             | 2.01                     | Unknown protein [ <i>A. thaliana</i> ] T48183         |

<sup>a</sup> p-value and fold changes of the highest available scan setting for each gene are given

<sup>b</sup> In cases where no blast hit for the EST was found the blast hit for the EST contig (ZmTUC) that includes the EST are given

<sup>c</sup> Functional classification according to the MIPS database (Munich Information Center for Protein sequences; version 2.0; <http://mips.gsf.de/proj/thal/db>)
